# Supplementary material
Source: PubMed Central journal article supplement (PMC6464125)
Supplement: NIHMS1525384-supplement-1.pdf [file NIHMS1525384-supplement-1.pdf]

## Supplementary Data

### **A decade of GWAS results in lung cancer**

Yohan Bossé<sup>1,2</sup> and Christopher I. Amos<sup>3</sup>

- 1) Institut universitaire de cardiologie et de pneumologie de Québec, Quebec, Canada;
- 2) Department of Molecular Medicine, Laval University, Quebec, Canada;
- 3) Department of Biomedical Data Science, Geisel School of Medicine at Dartmouth, Hanover, NH, USA.

**Supplementary Table 1.** Genetic loci associated with lung cancer survival identified by GWAS

| Reference        | Population <sup>a</sup>            | Cancer type & stage  | Sample size (death/total)                | Tx                                          | Median survival time (years) | Platform (# SNPs)                             | Region   | Gene                                     | Key SNPs                |
|------------------|------------------------------------|----------------------|------------------------------------------|---------------------------------------------|------------------------------|-----------------------------------------------|----------|------------------------------------------|-------------------------|
| Huang et al. (1) | USA<br>Norway                      | Early stage<br>NSCLC | 43/100<br>55/89                          | 8 adj radio,<br>1 adj chemo<br><i>none</i>  | 6.3<br>3.7                   | Affymetrix<br>250K<br>(74,666)                | 2q24.3   | <i>STK39</i>                             | rs10176669<br>rs4438452 |
|                  |                                    |                      |                                          |                                             |                              |                                               | 16p13.3  | <i>RBFOX1</i>                            | rs12446308              |
|                  |                                    |                      |                                          |                                             |                              |                                               | 20q13.12 | <i>EYA2</i>                              | rs13041757              |
|                  |                                    |                      |                                          |                                             |                              |                                               | 4p15.1   | <i>PCDH7</i>                             | rs10517215              |
| Wu et al. (2)    | Han<br>Chinese                     | SCLC                 | 186/245<br>191/305                       | Platinum-<br>based<br>chemo                 | 1.6<br>1.9                   | Affymetrix<br>5.0<br>(265,996)                | 11q22    | <i>YAP1</i>                              | rs10895256<br>rs1820453 |
|                  |                                    |                      |                                          |                                             |                              |                                               | 11q22.3  | <i>DYNC2H1</i>                           | rs716274                |
| Sato et al. (3)  | Japan                              | Advanced<br>NSCLC    | 89/105                                   | Carboplatin<br>and<br>paclitaxel            | 1.4                          | Illumina<br>Human-1<br>(109,365)              | 2q37.1   | <i>EIF4E2</i>                            | rs1656402               |
|                  |                                    |                      |                                          |                                             |                              |                                               | 21q22.2  | <i>ETS2</i><br><i>DSCAM</i>              | rs1209950<br>rs9981861  |
| Wu et al. (4)    | USA<br>USA<br>Spain                | Advanced<br>NSCLC    | NA/327<br>NA/315<br>NA/420               | Platinum-<br>based<br>chemo (no<br>surgery) | 1.1<br>1.4<br>0.7            | Illumina<br>HumanHap<br>300, 317<br>(307,260) | 12q23.3  | <i>CMKLR1</i>                            | rs1878022               |
|                  |                                    |                      |                                          |                                             |                              |                                               | 4p16.1   | <i>SORCS2</i>                            | rs10937823              |
| Hu et al. (5)    | Nanjing<br>Beijing<br>China<br>USA | Advanced<br>NSCLC    | 206/303<br>101/225<br>120/340<br>353/409 | Platinum-<br>based<br>chemo (no<br>surgery) | 1.2<br>1.9<br>2.0<br>1.0     | Affymetrix<br>6.0<br>(576,351)                | 3p22.1   | <i>CTNNB1</i>                            | rs7629386               |
|                  |                                    |                      |                                          |                                             |                              |                                               | 5p14.1   | <i>CDH9</i>                              | rs969088                |
|                  |                                    |                      |                                          |                                             |                              |                                               | 7q31.31  | <i>CFTR</i><br><i>WNT2</i><br><i>ST7</i> | rs41997                 |
|                  |                                    |                      |                                          |                                             |                              |                                               |          |                                          |                         |

| Reference         | Population <sup>a</sup>     | Cancer type & stage            | Sample size (death/total)             | Tx                                                          | Median survival time (years) | Platform (# SNPs)               | Region            | Gene                                                           | Key SNPs                              |
|-------------------|-----------------------------|--------------------------------|---------------------------------------|-------------------------------------------------------------|------------------------------|---------------------------------|-------------------|----------------------------------------------------------------|---------------------------------------|
|                   |                             |                                |                                       |                                                             |                              |                                 | 9p21.3<br>14q24.3 | <i>ELAVL2</i><br><i>SKIIP</i><br><i>ALKBH1</i><br><i>NRXN3</i> | rs12000445<br>rs3850370               |
| Lee et al. (6)    | Korea                       | Advanced NSCLC                 | 316/348                               | Chemo (no surgery)                                          | 2.1                          | Affymetrix 5.0 (271,827)        | 9p22.1            | <i>FAM154A</i>                                                 | rs1571228                             |
|                   |                             |                                |                                       |                                                             |                              |                                 | 2q34<br>4q25      | <i>CPS1</i><br><i>EGF</i>                                      | rs2371030<br>rs11098063<br>rs11568927 |
| Wu et al. (7)     | USA<br>USA<br><i>Taiwan</i> | Never smokers<br>NSCLC         | 217/327<br>187/293<br><i>875/1256</i> | Surgery,<br>radio,<br>chemo,<br>chemoradio                  | NA<br>NA<br>NA               | llumina<br>HumanHap<br>370, 660 | 6q16              | <i>EPHA7</i>                                                   | rs6901416                             |
|                   |                             |                                |                                       |                                                             |                              |                                 | 11p15.1           | <i>NELL1</i>                                                   | rs10766739                            |
| Tang et al. (8)   | China                       | Early stage NSCLC with surgery | 83/354<br><i>35/327</i>               | 22 adj<br>chemo<br><i>13 adj chemo</i>                      | 4.9<br><i>6.1</i>            | Affymetrix 6.0 (589,102)        | 4q26              | <i>CAMK2D</i>                                                  | rs10023113                            |
| Galvan et al. (9) | UK<br><i>Italy</i>          | Adenocarci noma, Stage I-IV    | 172/289<br><i>377/748</i>             | 188 chemo,<br>54 radio, 92<br>surgery<br><i>748 surgery</i> | NA<br>NA                     | llumina (30,568)                | 3p21-p14          | <i>PTPRG</i>                                                   | rs2107561                             |
|                   |                             |                                |                                       |                                                             |                              |                                 | 5q23.1            |                                                                | rs6882451<br>rs1826692<br>rs6595026   |

Abbreviations: Tx: Treatment.

<sup>a</sup>Italic indicates replication cohorts.

**References**

1. Huang YT, Heist RS, Chirieac LR, Lin X, Skaug V, Zienolddiny S, et al. Genome-wide analysis of survival in early-stage non-small-cell lung cancer. *J Clin Oncol*. 2009;27:2660-7.
2. Wu C, Xu B, Yuan P, Miao X, Liu Y, Guan Y, et al. Genome-wide interrogation identifies YAP1 variants associated with survival of small-cell lung cancer patients. *Cancer Res*. 2010;70:9721-9.
3. Sato Y, Yamamoto N, Kunitoh H, Ohe Y, Minami H, Laird NM, et al. Genome-wide association study on overall survival of advanced non-small cell lung cancer patients treated with carboplatin and paclitaxel. *Journal of thoracic oncology : official publication of the International Association for the Study of Lung Cancer*. 2011;6:132-8.
4. Wu X, Ye Y, Rosell R, Amos CI, Stewart DJ, Hildebrandt MA, et al. Genome-wide association study of survival in non-small cell lung cancer patients receiving platinum-based chemotherapy. *J Natl Cancer Inst*. 2011;103:817-25.
5. Hu L, Wu C, Zhao X, Heist R, Su L, Zhao Y, et al. Genome-wide association study of prognosis in advanced non-small cell lung cancer patients receiving platinum-based chemotherapy. *Clin Cancer Res*. 2012;18:5507-14.
6. Lee Y, Yoon KA, Joo J, Lee D, Bae K, Han JY, et al. Prognostic implications of genetic variants in advanced non-small cell lung cancer: a genome-wide association study. *Carcinogenesis*. 2013;34:307-13.
7. Wu X, Wang L, Ye Y, Aakre JA, Pu X, Chang GC, et al. Genome-wide association study of genetic predictors of overall survival for non-small cell lung cancer in never smokers. *Cancer Res*. 2013;73:4028-38.
8. Tang S, Pan Y, Wang Y, Hu L, Cao S, Chu M, et al. Genome-wide association study of survival in early-stage non-small cell lung cancer. *Annals of surgical oncology*. 2015;22:630-5.
9. Galvan A, Colombo F, Frullanti E, Dassano A, Noci S, Wang Y, et al. Germline polymorphisms and survival of lung adenocarcinoma patients: a genome-wide study in two European patient series. *International journal of cancer Journal international du cancer*. 2015;136:E262-71.
